# Supplementary material for: High Frankia abundance and low diversity of microbial community are associated with nodulation specificity and stability of sea buckthorn root nodule
Source: Front Plant Sci. 2024 Feb 21;15:1301447. doi: 10.3389/fpls.2024.1301447 (PMC10915256; doi:10.3389/fpls.2024.1301447)
Supplement: Supplementary file 1 [file Table_1.xlsx]

## Sheet: Sheet1
Supplementary Table S1 Sampling Site Profile.
Sample site	Latitude and longitude	Climate type	Total annual precipitation(mm)	Annual average temperature (℃)	Soil texture
Dengkou, Inner Mongolia Autonomous Region (DK)	106.952984,40.346495	Temperate semi-arid continental monsoon climate	262.6	9.1	sandy
Fuxin Mongolia Autonomous, Liaoning Province (FX)	121.740865,42.066714	Temperate Continental Monsoon Climate	555.9	8.8	sandy
Suiling, Heilongjiang Province (SL)	127.102843,47.249541	Northern temperate zone continental monsoon climate	645.5	2.3	medium loam
