# Supplementary material for: High Frankia abundance and low diversity of microbial community are associated with nodulation specificity and stability of sea buckthorn root nodule
Source: Front Plant Sci. 2024 Feb 21;15:1301447. doi: 10.3389/fpls.2024.1301447 (PMC10915256; doi:10.3389/fpls.2024.1301447)
Supplement: Supplementary file 2 [file Table_2.xlsx]

## Sheet: Supplementary Table S2
Supplementary Table S2 Summary of the 16S amplicon sequencing of all samples
Sample ID	Raw Reads	Clean Reads	Denoised Reads	Merged Reads	Non-chimeric Reads	OTU_Num
DKBS1	80165	79881	78742	60567	46551	1446
DKBS2	79969	79670	78668	60148	46186	1414
DKBS3	80484	80189	78925	58935	46421	1503
DKNS1	80188	793934	78206	64698	52416	1507
DKNS2	80008	79205	77552	62484	49262	1503
DKNS3	79962	79063	76156	61327	47820	1422
DKRN1	160350	159752	159075	146317	127903	844
DKRN2	159673	159100	158260	148050	133828	913
DKRN3	160241	159582	158829	147160	125773	847
FXBS1	80115	77103	75938	61741	48295	1965
FXBS2	79815	76781	75719	61510	47309	2046
FXBS3	80159	77016	75917	63240	49384	1990
FXNS1	79933	76231	73429	58764	44812	1948
FXNS2	79908	76856	75730	60693	46452	2085
FXNS3	80138	76743	75339	59985	45995	2040
FXRN1	80030	74661	74143	67728	58388	363
FXRN2	79828	75054	74563	67970	58042	435
FXRN3	80021	75046	74496	67506	54279	402
SLBS1	80024	77039	76025	61669	48812	1924
SLBS2	79680	76319	75337	60784	47707	1859
SLBS3	80194	76889	75865	62108	49114	1978
SLNS1	80115	76827	75398	58978	44796	2066
SLNS2	79788	76414	75169	59819	45890	2032
SLNS3	80029	76905	75428	61073	47538	2124
SLRN1	79844	74788	74327	68473	59330	375
SLRN2	80048	74900	74268	67268	57046	464
SLRN3	80074	75065	74657	71866	67249	375
