# Supplementary material for: High Frankia abundance and low diversity of microbial community are associated with nodulation specificity and stability of sea buckthorn root nodule
Source: Front Plant Sci. 2024 Feb 21;15:1301447. doi: 10.3389/fpls.2024.1301447 (PMC10915256; doi:10.3389/fpls.2024.1301447)
Supplement: Supplementary file 3 [file Table_3.xlsx]

## Sheet: Supplementary Table S2
Supplementary Table S3 Summary of the metagenome sequencing of all samples
Sample	Raw Data	Clean Data	Percent of raw reads (%)	Contigs	Total length (bp)	N50(bp)	N75(bp)	Largest contig (bp)
DK_BS_1	99931252	98858158	98.93	84725	64966324	693	567	43890
DK_BS_2	76896866	76076440	98.93	48562	40574433	753	580	76496
DK_BS_3	107802500	106444974	98.74	96565	74648186	701	571	43890
DK_NS_1	81943850	81056946	98.92	146668	118423560	758	587	57155
DK_NS_2	87463126	86531110	98.93	129249	95196329	696	572	69414
DK_NS_3	83358354	82515132	98.99	112691	83182543	694	569	49598
DK_RN_1	141064524	138980428	98.52	34363	52686732	2151	939	67802
DK_RN_2	144109492	141874810	98.45	42126	67312358	2305	1063	46219
DK_RN_3	157578944	155304352	98.56	26062	40290149	2205	992	53010
FX_BS_1	84203266	83386874	99.03	117869	81984819	659	559	15364
FX_BS_2	79201544	78502640	99.12	129888	89428004	653	557	52791
FX_BS_3	73018610	72262878	98.97	46715	30801404	619	545	19871
FX_NS_1	92456146	91560172	99.03	174672	157281195	853	614	113739
FX_NS_2	69776984	69058210	98.97	95736	78388240	754	583	28028
FX_NS_3	86778626	85837392	98.92	152983	121918628	744	584	41622
FX_RN_1	182414134	180659922	99.04	56997	80706330	2043	853	271339
FX_RN_2	133018962	131225900	98.65	37021	52764725	1866	836	91252
FX_RN_3	166204472	163746256	98.52	45136	64157340	1945	855	79751
SL_BS_1	112394554	111301138	99.03	357826	320559643	851	613	62713
SL_BS_2	125369000	124211138	99.08	489959	447516898	874	618	84650
SL_BS_3	119208906	117973556	98.96	282485	250209528	837	610	49361
SL_NS_1	111342198	110246762	99.02	177308	153049204	803	597	86956
SL_NS_2	87626578	86748834	99	102129	82641862	741	582	54943
SL_NS_3	104448886	103243614	98.85	225255	205201664	865	617	54701
SL_RN_1	176070150	172916558	98.21	156085	154233769	993	666	54003
SL_RN_2	156903254	154563178	98.51	52168	69630501	1692	767	108878
SL_RN_3	202223308	198041464	97.93	117702	145548949	1396	777	170342
