# Supplementary material for: High Frankia abundance and low diversity of microbial community are associated with nodulation specificity and stability of sea buckthorn root nodule
Source: Front Plant Sci. 2024 Feb 21;15:1301447. doi: 10.3389/fpls.2024.1301447 (PMC10915256; doi:10.3389/fpls.2024.1301447)
Supplement: Supplementary file 4 [file Table_4.xlsx]

## Sheet: Supplementary Table S7
Supplementary Table S4 Differences in the abundance of Actinobacteria at different compartments in different sites.
		DK				FX				SL
		BS (Mean ± SD, n=3)	NS (Mean ± SD, n=3)	RN (Mean ± SD, n=3)		BS (Mean ± SD, n=3)	NS (Mean ± SD, n=3)	RN (Mean ± SD, n=3)		BS (Mean ± SD, n=3)	NS (Mean ± SD, n=3)	RN (Mean ± SD, n=3)
	p__Actinobacteria	0.1856±0.0105c	0.2379±0.021b	0.8501±0.0123a		0.3169±0.0246b	0.3718±0.0244b	0.8471±0.0162a		0.1068±0.0049b	0.1806±0.0532b	0.7996±0.0467a
p__Actinobacteria	c__Actinobacteria	0.1548±0.0084c	0.2088±0.0158b	0.8485±0.0125a		0.2434±0.0182c	0.3042±0.0177b	0.8447±0.0166a		0.0803±0.0031b	0.1377±0.0405b	0.7976±0.0469a
	c__Thermoleophilia	0.0257±0.0019a	0.0248±0.005a	0.0012±0.0002b		0.0653±0.0063a	0.0619±0.0069a	0.0019±0.0006b		0.0216±0.0014ab	0.0372±0.0118a	0.0017±0.0002b
	c__Acidimicrobiia	0.0027±0.0002a	0.0027±0.0001a	0.0003±0b		0.0042±0.0001a	0.003±0.0002b	0.0004±0c		0.0023±0.0002a	0.0025±0.0003a	0.0002±0b
	c__Rubrobacteria	0.0022±0.0001a	0.0015±0.0001b	0±0c		0.0035±0.0003a	0.0023±0.0001b	0±0c		0.0023±0.0002a	0.0029±0.0005a	0.0001±0.0001b
	c__Coriobacteriia	0.0003±0a	0.0002±0b	0±0c		0.0004±0.0001a	0.0003±0b	0±0c		0.0003±0a	0.0003±0.0001a	0±0b
c__Actinobacteria	o__Frankiales	0.0124±0.0021b	0.0137±0.0024b	0.7561±0.0176a		0.0162±0.0012b	0.0168±0.0023b	0.7161±0.0259a		0.0071±0.0004b	0.0142±0.0063b	0.6838±0.0777a
	o__Corynebacteriales	0.0367±0.0029b	0.0601±0.0084a	0.0238±0.0111b		0.048±0.0087b	0.1124±0.0194a	0.0324±0.0082b		0.0131±0.0004a	0.0293±0.0145a	0.0467±0.0206a
	o__Streptomycetales	0.0261±0.0037b	0.0431±0.0063a	0.0324±0.0016ab		0.0387±0.0015b	0.0508±0.0084ab	0.0564±0.0065a		0.0141±0.0008b	0.0238±0.0097ab	0.0336±0.0032a
	o__Propionibacteriales	0.0214±0.0023a	0.0231±0.0015a	0.0026±0.0008b		0.0492±0.0059a	0.0455±0.0052a	0.0041±0.0008b		0.01±0.0004ab	0.0182±0.0071a	0.0041±0.0027b
	o__Pseudonocardiales	0.0149±0.0012b	0.024±0.0044a	0.0103±0.0017b		0.0223±0.0014a	0.0236±0.0027a	0.0146±0.0018b		0.0091±0.0007ab	0.0122±0.0031a	0.0069±0.0013b
	o__Micrococcales	0.0194±0.0018a	0.0154±0.0013ab	0.0063±0.0069b		0.0233±0.0027a	0.0207±0.0016a	0.0037±0.0007b		0.0078±0.0002b	0.0126±0.003a	0.0024±0.0009c
	o__Micromonosporales	0.0096±0.0005b	0.0136±0.0017a	0.0083±0.0009b		0.0203±0.0009a	0.0147±0.003b	0.009±0.0011c		0.0074±0.0009a	0.0118±0.0046a	0.0119±0.0037a
	o__Streptosporangiales	0.0043±0.0003b	0.005±0.0004ab	0.0052±0.0005a		0.0078±0.0007a	0.0062±0.0004b	0.0053±0.0006b		0.0039±0.0004a	0.0052±0.0014a	0.0045±0.0002a
	o__Actinobacteria_noname	0.0047±0.0003a	0.0048±0.0002a	0.0004±0.0001b		0.0074±0.0003a	0.0057±0.0005b	0.0004±0.0001c		0.0035±0.0003a	0.0043±0.0009a	0.0006±0.0001b
	o__Geodermatophilales	0.0022±0.0002a	0.0021±0.0002a	0.0012±0b		0.0048±0.0002a	0.0034±0.0003b	0.0013±0.0002c		0.002±0.0001a	0.0027±0.0007a	0.0007±0.0002b
o__Frankiales	f__Frankiaceae	0.0112±0.0021b	0.0117±0.0027b	0.7553±0.0174a		0.0141±0.0012b	0.0149±0.0024b	0.7154±0.026a		0.0063±0.0004b	0.0132±0.006b	0.6831±0.0777a
	f__Sporichthyaceae	0.0009±0ab	0.0016±0.0004a	0.0004±0.0003b		0.0014±0.0001a	0.0014±0.0001a	0.0002±0b		0.0004±0ab	0.0006±0.0002a	0.0002±0.0001b
	f__Cryptosporangiaceae	0.0003±0a	0.0004±0a	0.0005±0.0002a		0.0007±0.0001a	0.0005±0a	0.0005±0.0002a		0.0003±0a	0.0004±0.0001a	0.0005±0.0001a
f__Frankiales	g__Frankia	0.0112±0.0021b	0.0117±0.0027b	0.7553±0.0174a		0.0141±0.0012b	0.0149±0.0024b	0.7154±0.026a		0.0063±0.0004b	0.0132±0.006b	0.6831±0.0777a
	g__Sporichthya	0.0009±0ab	0.0016±0.0004a	0.0004±0.0003b		0.0014±0.0001a	0.0014±0.0001a	0.0002±0b		0.0004±0ab	0.0006±0.0002a	0.0002±0.0001b
	g__Cryptosporangium	0.0003±0a	0.0004±0a	0.0005±0.0002a		0.0007±0.0001a	0.0005±0a	0.0005±0.0002a		0.0003±0a	0.0004±0.0001a	0.0005±0.0001a
s__Frankia	s__Frankia_sp._EAN1pec	0.0055±0.0016b	0.0041±0.0009b	0.4586±0.0287a		0.0045±0.0007b	0.0054±0.0013b	0.4227±0.0308a		0.0017±0.0001b	0.0053±0.0025b	0.4592±0.0382a
	s__Frankia_sp._BCU110501	0.0008±0.0001b	0.0012±0.0002b	0.1044±0.0237a		0.0012±0.0002b	0.0014±0.0003b	0.0889±0.0072a		0.0006±0b	0.0015±0.0006b	0.1±0.015a
	s__Frankia_sp._BMG5.12	0.0017±0.0001b	0.0024±0.0006b	0.0721±0.0236a		0.0024±0.0001b	0.0025±0.0002b	0.0608±0.0078a		0.0011±0.0001b	0.0017±0.0004b	0.0238±0.0025a
	s__Frankia_sp._EUN1f	0.001±0.0001b	0.0012±0.0002b	0.0316±0.0017a		0.0015±0.0001b	0.0017±0.0003b	0.0587±0.0261a		0.0007±0b	0.0011±0.0003b	0.0244±0.0036a
Notes: Mean: the average value of the same type of sample; SD: Standard Deviation; ANOVA was used to show the significance among groups at α=0.05 level.
