# Supplementary material for: High Frankia abundance and low diversity of microbial community are associated with nodulation specificity and stability of sea buckthorn root nodule
Source: Front Plant Sci. 2024 Feb 21;15:1301447. doi: 10.3389/fpls.2024.1301447 (PMC10915256; doi:10.3389/fpls.2024.1301447)
Supplement: Supplementary file 5 [file Table_5.xlsx]

## Sheet: Supplementary Table S4
Supplementary Table S5 Spearman correlation coefficient of microbial community (genus level) in bulk soil (BS) samples
Node_Num = 30, Edge_Num = 153
Node1_Name	Node2_Name	Coefficient	P-value	Relation
g__Bradyrhizobium_p__Proteobacteria	g__Variovorax_p__Proteobacteria	-0.783333	0.0172233	negtive
g__Bradyrhizobium	g__Burkholderia	-0.9	0.00202822	negtive
g__Bradyrhizobium	g__Lysobacter	-0.95	0.000352734	negtive
g__Rhizobium_p__Proteobacteria	g__Sphingomonas_p__Proteobacteria	-0.833333	0.0082672	negtive
g__Arthrobacter_p__Actinobacteria	g__Sphingomonas	-0.7	0.043254	negtive
g__Haliangium_p__Proteobacteria	g__Sphingomonas	-0.7	0.043254	negtive
g__Gemmatimonadetes_noname_p__Gemmatimonadetes	g__Streptomyces_p__Actinobacteria	-0.933333	0.000749559	negtive
g__Gemmatimonadetes_noname	g__Mycobacterium	-0.983333	4.96032e-05	negtive
g__Gemmatimonadetes_noname	g__Solirubrobacter	-0.95	0.000352734	negtive
g__Conexibacter_p__Actinobacteria	g__Gemmatimonadetes_noname	-0.9	0.00202822	negtive
g__Gemmatimonadetes_noname	g__Nocardioides	-0.933333	0.000749559	negtive
g__Frankia_p__Actinobacteria	g__Gemmatimonadetes_noname	-0.833333	0.0082672	negtive
g__Gemmatimonadetes_noname	g__Mesorhizobium	-0.983333	4.96032e-05	negtive
g__Actinoplanes_p__Actinobacteria	g__Gemmatimonadetes_noname	-0.933333	0.000749559	negtive
g__Gemmatimonadetes_noname	g__Kribbella	-0.9	0.00202822	negtive
g__Gemmatimonadetes_noname	g__Solirubrobacterales_noname	-0.9	0.00202822	negtive
g__Bacteria_noname_p__Bacteria_noname	g__Streptomyces	-0.733333	0.0311232	negtive
g__Gemmatimonas_p__Gemmatimonadetes	g__Streptomyces	-0.9	0.00202822	negtive
g__Nitrospira_p__Nitrospirae	g__Streptomyces	-0.783333	0.0172233	negtive
g__Candidatus_Entotheonella_p__Proteobacteria	g__Streptomyces	-0.85	0.00607363	negtive
g__Pyrinomonas_p__Acidobacteria	g__Rhizobium	-0.883333	0.0030754	negtive
g__Arthrobacter	g__Pyrinomonas	-0.816667	0.0107694	negtive
g__Bacteria_noname	g__Mycobacterium	-0.833333	0.0082672	negtive
g__Gemmatimonas	g__Mycobacterium	-0.966667	0.000165344	negtive
g__Candidatus_Solibacter_p__Acidobacteria	g__Mycobacterium	-0.7	0.043254	negtive
g__Mycobacterium_p__Actinobacteria	g__Nitrospira	-0.816667	0.0107694	negtive
g__Candidatus_Entotheonella	g__Mycobacterium	-0.916667	0.00131173	negtive
g__Bacteria_noname	g__Solirubrobacter	-0.766667	0.02139	negtive
g__Bacteria_noname	g__Conexibacter	-0.7	0.043254	negtive
g__Bacteria_noname	g__Nocardioides	-0.816667	0.0107694	negtive
g__Bacteria_noname	g__Frankia	-0.816667	0.0107694	negtive
g__Bacteria_noname	g__Mesorhizobium	-0.783333	0.0172233	negtive
g__Bacteria_noname	g__Rhizobium	-0.816667	0.0107694	negtive
g__Actinoplanes	g__Bacteria_noname	-0.816667	0.0107694	negtive
g__Bacteria_noname	g__Kribbella	-0.766667	0.02139	negtive
g__Arthrobacter	g__Bacteria_noname	-0.85	0.00607363	negtive
g__Bacteria_noname	g__Solirubrobacterales_noname	-0.7	0.043254	negtive
g__Gemmatimonas	g__Solirubrobacter	-0.933333	0.000749559	negtive
g__Nitrospira	g__Solirubrobacter	-0.816667	0.0107694	negtive
g__Candidatus_Entotheonella	g__Solirubrobacter	-0.883333	0.0030754	negtive
g__Afipia_p__Proteobacteria	g__Variovorax	-0.7	0.043254	negtive
g__Conexibacter	g__Gemmatimonas	-0.866667	0.00450838	negtive
g__Gemmatimonas	g__Nocardioides	-0.916667	0.00131173	negtive
g__Frankia	g__Gemmatimonas	-0.85	0.00607363	negtive
g__Gemmatimonas	g__Mesorhizobium	-0.95	0.000352734	negtive
g__Actinoplanes	g__Gemmatimonas	-0.916667	0.00131173	negtive
g__Gemmatimonas	g__Kribbella	-0.866667	0.00450838	negtive
g__Gemmatimonas	g__Solirubrobacterales_noname	-0.866667	0.00450838	negtive
g__Conexibacter	g__Nitrospira	-0.866667	0.00450838	negtive
g__Candidatus_Entotheonella	g__Conexibacter	-0.833333	0.0082672	negtive
g__Acidobacteriaceae_noname_p__Acidobacteria	g__Nocardioides	-0.7	0.043254	negtive
g__Nitrospira	g__Nocardioides	-0.783333	0.0172233	negtive
g__Candidatus_Entotheonella	g__Nocardioides	-0.916667	0.00131173	negtive
g__Candidatus_Solibacter	g__Rhizobium	-0.833333	0.0082672	negtive
g__Arthrobacter	g__Candidatus_Solibacter	-0.833333	0.0082672	negtive
g__Acidobacteriaceae_noname	g__Frankia	-0.7	0.043254	negtive
g__Candidatus_Entotheonella	g__Frankia	-0.916667	0.00131173	negtive
g__Acidobacteriaceae_noname	g__Rhizobium	-0.8	0.0138283	negtive
g__Acidobacteriaceae_noname	g__Actinoplanes	-0.7	0.043254	negtive
g__Acidobacteriaceae_noname	g__Arthrobacter	-0.816667	0.0107694	negtive
g__Mesorhizobium_p__Proteobacteria	g__Nitrospira	-0.8	0.0138283	negtive
g__Candidatus_Entotheonella	g__Mesorhizobium	-0.9	0.00202822	negtive
g__Reyranella_p__Proteobacteria	g__Rhizobium	-0.933333	0.000749559	negtive
g__Candidatus_Koribacter_p__Acidobacteria	g__Rhizobium	-0.9	0.00202822	negtive
g__Arthrobacter	g__Reyranella	-0.766667	0.02139	negtive
g__Arthrobacter	g__Candidatus_Koribacter	-0.783333	0.0172233	negtive
g__Afipia	g__Burkholderia	-0.916667	0.00131173	negtive
g__Actinoplanes	g__Nitrospira	-0.783333	0.0172233	negtive
g__Kribbella_p__Acidobacteria	g__Nitrospira	-0.733333	0.0311232	negtive
g__Nitrospira	g__Solirubrobacterales_noname	-0.866667	0.00450838	negtive
g__Actinoplanes	g__Candidatus_Entotheonella	-0.916667	0.00131173	negtive
g__Candidatus_Entotheonella	g__Kribbella	-0.9	0.00202822	negtive
g__Arthrobacter	g__Candidatus_Entotheonella	-0.716667	0.0368662	negtive
g__Candidatus_Entotheonella	g__Solirubrobacterales_noname	-0.833333	0.0082672	negtive
g__Kribbella	g__Novosphingobium_p__Proteobacteria	-0.7	0.043254	negtive
g__Afipia	g__Lysobacter	-0.916667	0.00131173	negtive
g__Afipia	g__Bradyrhizobium	0.916667	0.00131173	positive
g__Pyrinomonas	g__Sphingomonas	0.866667	0.00450838	positive
g__Reyranella	g__Sphingomonas	0.9	0.00202822	positive
g__Candidatus_Koribacter	g__Sphingomonas	0.883333	0.0030754	positive
g__Bacteria_noname	g__Gemmatimonadetes_noname	0.816667	0.0107694	positive
g__Gemmatimonadetes_noname	g__Gemmatimonas	0.983333	4.96032e-05	positive
g__Gemmatimonadetes_noname	g__Nitrospira	0.766667	0.02139	positive
g__Candidatus_Entotheonella	g__Gemmatimonadetes_noname	0.933333	0.000749559	positive
g__Mycobacterium	g__Streptomyces	0.9	0.00202822	positive
g__Solirubrobacter_p__Acidobacteria	g__Streptomyces	0.983333	4.96032e-05	positive
g__Conexibacter	g__Streptomyces	0.966667	0.000165344	positive
g__Nocardioides_p__Acidobacteria	g__Streptomyces	0.966667	0.000165344	positive
g__Frankia	g__Streptomyces	0.833333	0.0082672	positive
g__Mesorhizobium	g__Streptomyces	0.9	0.00202822	positive
g__Actinoplanes	g__Streptomyces	0.966667	0.000165344	positive
g__Kribbella	g__Streptomyces	0.966667	0.000165344	positive
g__Solirubrobacterales_noname_p__Acidobacteria	g__Streptomyces	0.966667	0.000165344	positive
g__Candidatus_Solibacter	g__Pyrinomonas	0.866667	0.00450838	positive
g__Acidobacteriaceae_noname	g__Pyrinomonas	0.883333	0.0030754	positive
g__Pyrinomonas	g__Reyranella	0.816667	0.0107694	positive
g__Candidatus_Koribacter	g__Pyrinomonas	0.983333	4.96032e-05	positive
g__Mycobacterium	g__Solirubrobacter	0.933333	0.000749559	positive
g__Conexibacter	g__Mycobacterium	0.883333	0.0030754	positive
g__Mycobacterium	g__Nocardioides	0.9	0.00202822	positive
g__Frankia	g__Mycobacterium	0.8	0.0138283	positive
g__Mesorhizobium	g__Mycobacterium	0.966667	0.000165344	positive
g__Actinoplanes	g__Mycobacterium	0.9	0.00202822	positive
g__Kribbella	g__Mycobacterium	0.85	0.00607363	positive
g__Mycobacterium	g__Solirubrobacterales_noname	0.883333	0.0030754	positive
g__Bacteria_noname	g__Gemmatimonas	0.8	0.0138283	positive
g__Bacteria_noname	g__Candidatus_Solibacter	0.866667	0.00450838	positive
g__Acidobacteriaceae_noname	g__Bacteria_noname	0.833333	0.0082672	positive
g__Bacteria_noname	g__Candidatus_Koribacter	0.7	0.043254	positive
g__Bacteria_noname	g__Candidatus_Entotheonella	0.916667	0.00131173	positive
g__Conexibacter	g__Solirubrobacter	0.983333	4.96032e-05	positive
g__Nocardioides	g__Solirubrobacter	0.983333	4.96032e-05	positive
g__Frankia	g__Solirubrobacter	0.883333	0.0030754	positive
g__Mesorhizobium	g__Solirubrobacter	0.916667	0.00131173	positive
g__Actinoplanes	g__Solirubrobacter	0.983333	4.96032e-05	positive
g__Kribbella	g__Solirubrobacter	0.95	0.000352734	positive
g__Solirubrobacter	g__Solirubrobacterales_noname	0.983333	4.96032e-05	positive
g__Burkholderia_p__Proteobacteria	g__Variovorax	0.75	0.0254905	positive
g__Lysobacter_p__Proteobacteria	g__Variovorax	0.85	0.00607363	positive
g__Candidatus_Solibacter	g__Gemmatimonas	0.7	0.043254	positive
g__Candidatus_Entotheonella	g__Gemmatimonas	0.916667	0.00131173	positive
g__Conexibacter	g__Nocardioides	0.966667	0.000165344	positive
g__Conexibacter	g__Frankia	0.85	0.00607363	positive
g__Conexibacter	g__Mesorhizobium	0.883333	0.0030754	positive
g__Actinoplanes	g__Conexibacter	0.966667	0.000165344	positive
g__Conexibacter	g__Kribbella	0.933333	0.000749559	positive
g__Conexibacter	g__Solirubrobacterales_noname	1	5.51146e-06	positive
g__Frankia	g__Nocardioides	0.933333	0.000749559	positive
g__Mesorhizobium	g__Nocardioides	0.9	0.00202822	positive
g__Actinoplanes	g__Nocardioides	1	5.51146e-06	positive
g__Kribbella	g__Nocardioides	0.966667	0.000165344	positive
g__Nocardioides	g__Solirubrobacterales_noname	0.966667	0.000165344	positive
g__Acidobacteriaceae_noname	g__Candidatus_Solibacter	0.983333	4.96032e-05	positive
g__Candidatus_Koribacter	g__Candidatus_Solibacter	0.883333	0.0030754	positive
g__Candidatus_Entotheonella	g__Candidatus_Solibacter	0.7	0.043254	positive
g__Frankia	g__Mesorhizobium	0.766667	0.02139	positive
g__Actinoplanes	g__Frankia	0.933333	0.000749559	positive
g__Frankia	g__Kribbella	0.9	0.00202822	positive
g__Frankia	g__Solirubrobacterales_noname	0.85	0.00607363	positive
g__Frankia	g__Haliangium	0.733333	0.0311232	positive
g__Acidobacteriaceae_noname	g__Candidatus_Koribacter	0.9	0.00202822	positive
g__Actinoplanes	g__Mesorhizobium	0.9	0.00202822	positive
g__Kribbella	g__Mesorhizobium	0.85	0.00607363	positive
g__Mesorhizobium	g__Solirubrobacterales_noname	0.883333	0.0030754	positive
g__Arthrobacter	g__Rhizobium	0.9	0.00202822	positive
g__Candidatus_Koribacter	g__Reyranella	0.833333	0.0082672	positive
g__Burkholderia	g__Novosphingobium	0.75	0.0254905	positive
g__Burkholderia	g__Lysobacter	0.9	0.00202822	positive
g__Candidatus_Entotheonella	g__Nitrospira	0.733333	0.0311232	positive
g__Actinoplanes	g__Kribbella	0.966667	0.000165344	positive
g__Actinoplanes	g__Solirubrobacterales_noname	0.966667	0.000165344	positive
g__Kribbella	g__Solirubrobacterales_noname	0.933333	0.000749559	positive
g__Haliangium	g__Kribbella	0.7	0.043254	positive
