# Supplementary material for: High Frankia abundance and low diversity of microbial community are associated with nodulation specificity and stability of sea buckthorn root nodule
Source: Front Plant Sci. 2024 Feb 21;15:1301447. doi: 10.3389/fpls.2024.1301447 (PMC10915256; doi:10.3389/fpls.2024.1301447)
Supplement: Supplementary file 6 [file Table_6.xlsx]

## Sheet: Supplementary Table S5
Supplementary Table S6 Spearman correlation coefficient of microbial community (genus level) in nudule surface soil (NS) samples
Node_Num = 30, Edge_Num = 122
Node1_Name	Node2_Name	Coefficient	P-value	Relation
g__Frankia_p__Actinobacteria	g__Solirubrobacter	0.75	0.0254905	positive
g__Conexibacter_p__Actinobacteria	g__Frankia	0.733333	0.0311232	positive
g__Frankia	g__Solirubrobacterales_noname_p__Actinobacteria	0.733333	0.0311232	positive
g__Gemmatimonadetes_noname_p__Gemmatimonadetes	g__Mycobacterium	-0.966667	0.0368662	negtive
g__Mycobacterium_p__Actinobacteria	g__Variovorax_p__Proteobacteria	-0.716667	0.0030754	negtive
g__Bacteria_noname_p__Bacteria_noname	g__Mycobacterium	-0.883333	0.000165344	negtive
g__Gemmatimonas_p__Gemmatimonadetes	g__Mycobacterium	-0.966667	0.0368662	negtive
g__Mycobacterium	g__Nitrospira	-0.716667	0.00131173	negtive
g__Burkholderia_p__Proteobacteria	g__Mycobacterium	-0.916667	0.0368662	negtive
g__Mycobacterium	g__Pseudomonas	-0.716667	0.000749559	negtive
g__Gemmatimonadetes_noname	g__Streptomyces_p__Actinobacteria	-0.933333	0.00131173	negtive
g__Bacteria_noname	g__Streptomyces	-0.916667	0.000749559	negtive
g__Gemmatimonas	g__Streptomyces	-0.933333	0.0254905	negtive
g__Nitrospira_p__Nitrospirae	g__Streptomyces	-0.75	0.00607363	negtive
g__Burkholderia	g__Streptomyces	-0.85	0.0311232	negtive
g__Acidobacteriaceae_noname_p__Acidobacteria	g__Streptomyces	-0.733333	0.0254905	negtive
g__Sphingomonas_p__Proteobacteria	g__Variovorax	-0.75	0.0254905	negtive
g__Gemmatimonadetes_noname	g__Solirubrobacter	-0.75	0.0082672	negtive
g__Gemmatimonadetes_noname	g__Nocardia	-0.833333	0.02139	negtive
g__Gemmatimonadetes_noname	g__Mesorhizobium	-0.766667	0.043254	negtive
g__Conexibacter	g__Gemmatimonadetes_noname	-0.7	0.00607363	negtive
g__Gemmatimonadetes_noname	g__Nocardioides_p__Actinobacteria	-0.85	0.0030754	negtive
g__Gemmatimonadetes_noname	g__Kribbella	-0.883333	0.0311232	negtive
g__Gemmatimonadetes_noname	g__Novosphingobium	-0.733333	0.043254	negtive
g__Gemmatimonadetes_noname	g__Solirubrobacterales_noname	-0.7	0.0082672	negtive
g__Amycolatopsis_p__Actinobacteria	g__Gemmatimonadetes_noname	-0.833333	0.0172233	negtive
g__Nocardia_p__Actinobacteria	g__Variovorax	-0.783333	0.0172233	negtive
g__Kribbella_p__Actinobacteria	g__Variovorax	-0.783333	0.02139	negtive
g__Reyranella_p__Proteobacteria	g__Solirubrobacter	-0.766667	0.0254905	negtive
g__Gemmatimonas	g__Solirubrobacter	-0.75	0.043254	negtive
g__Burkholderia	g__Solirubrobacter	-0.7	0.02139	negtive
g__Pyrinomonas_p__Acidobacteria	g__Rhizobium_p__Proteobacteria	-0.766667	0.0138283	negtive
g__Pyrinomonas	g__Reyranella	-0.8	0.0311232	negtive
g__Lysobacter_p__Proteobacteria	g__Pyrinomonas	-0.733333	0.043254	negtive
g__Nocardia	g__Reyranella	-0.7	0.0082672	negtive
g__Gemmatimonas	g__Nocardia	-0.833333	0.0172233	negtive
g__Burkholderia	g__Nocardia	-0.783333	0.043254	negtive
g__Bacteria_noname	g__Kribbella	-0.7	0.0030754	negtive
g__Candidatus_Solibacter_p__Acidobacteria	g__Rhizobium	-0.883333	0.0311232	negtive
g__Acidobacteriaceae_noname	g__Rhizobium	-0.733333	0.00131173	negtive
g__Candidatus_Koribacter_p__Acidobacteria	g__Rhizobium	-0.916667	0.02139	negtive
g__Gemmatimonas	g__Mesorhizobium_p__Proteobacteria	-0.766667	0.00607363	negtive
g__Burkholderia	g__Mesorhizobium	-0.85	0.0082672	negtive
g__Conexibacter	g__Reyranella	-0.833333	0.043254	negtive
g__Conexibacter	g__Gemmatimonas	-0.7	0.00607363	negtive
g__Gemmatimonas	g__Nocardioides	-0.85	0.00202822	negtive
g__Burkholderia	g__Nocardioides	-0.9	0.0030754	negtive
g__Gemmatimonas	g__Kribbella	-0.883333	0.0030754	negtive
g__Burkholderia	g__Kribbella	-0.883333	0.0082672	negtive
g__Reyranella	g__Solirubrobacterales_noname	-0.833333	0.0311232	negtive
g__Gemmatimonas	g__Novosphingobium	-0.733333	0.0172233	negtive
g__Burkholderia	g__Novosphingobium	-0.783333	0.0172233	negtive
g__Novosphingobium_p__Proteobacteria	g__Pseudomonas_p__Proteobacteria	-0.783333	0.043254	negtive
g__Gemmatimonas	g__Solirubrobacterales_noname	-0.7	0.0082672	negtive
g__Amycolatopsis	g__Gemmatimonas	-0.833333	0.0107694	negtive
g__Burkholderia	g__Hyphomicrobium	-0.816667	0.00202822	negtive
g__Amycolatopsis	g__Burkholderia	-0.9	0.0254905	negtive
g__Actinoplanes_p__Actinobacteria	g__Bradyrhizobium_p__Proteobacteria	0.75	0.000749559	positive
g__Mycobacterium	g__Streptomyces	0.933333	0.0368662	positive
g__Mycobacterium	g__Solirubrobacter	0.716667	0.0138283	positive
g__Mycobacterium	g__Nocardia	0.8	0.0107694	positive
g__Mesorhizobium	g__Mycobacterium	0.816667	0.0107694	positive
g__Mycobacterium	g__Nocardioides	0.816667	0.0082672	positive
g__Kribbella	g__Mycobacterium	0.833333	0.02139	positive
g__Mycobacterium	g__Novosphingobium	0.766667	0.0311232	positive
g__Amycolatopsis	g__Mycobacterium	0.733333	0.0311232	positive
g__Nocardia	g__Streptomyces	0.733333	0.0368662	positive
g__Nocardioides	g__Streptomyces	0.716667	0.0138283	positive
g__Kribbella	g__Streptomyces	0.8	0.00450838	positive
g__Pyrinomonas	g__Sphingomonas	0.866667	0.0368662	positive
g__Gemmatimonadetes_noname	g__Variovorax	0.716667	0.0030754	positive
g__Bacteria_noname	g__Gemmatimonadetes_noname	0.883333	5.51146e-06	positive
g__Gemmatimonadetes_noname	g__Gemmatimonas	1	0.02139	positive
g__Gemmatimonadetes_noname	g__Nitrospira	0.766667	0.000352734	positive
g__Burkholderia	g__Gemmatimonadetes_noname	0.95	0.043254	positive
g__Acidobacteriaceae_noname	g__Gemmatimonadetes_noname	0.7	0.0254905	positive
g__Gemmatimonadetes_noname	g__Pseudomonas	0.75	0.0254905	positive
g__Reyranella	g__Variovorax	0.75	0.0368662	positive
g__Gemmatimonas	g__Variovorax	0.716667	0.00450838	positive
g__Pseudomonas	g__Variovorax	0.866667	0.0082672	positive
g__Nocardia	g__Solirubrobacter	0.833333	4.96032e-05	positive
g__Conexibacter	g__Solirubrobacter	0.983333	0.00607363	positive
g__Nocardioides	g__Solirubrobacter	0.85	0.0138283	positive
g__Kribbella	g__Solirubrobacter	0.8	4.96032e-05	positive
g__Solirubrobacter_p__Actinobacteria	g__Solirubrobacterales_noname	0.983333	0.043254	positive
g__Candidatus_Koribacter	g__Pyrinomonas	0.7	0.0138283	positive
g__Conexibacter	g__Nocardia	0.8	0.000165344	positive
g__Kribbella	g__Nocardia	0.966667	0.0138283	positive
g__Nocardia	g__Solirubrobacterales_noname	0.8	0.0030754	positive
g__Bacteria_noname	g__Gemmatimonas	0.883333	0.0030754	positive
g__Bacteria_noname	g__Nitrospira	0.883333	0.0172233	positive
g__Bacteria_noname	g__Burkholderia	0.783333	0.0172233	positive
g__Acidobacteriaceae_noname	g__Bacteria_noname	0.783333	0.043254	positive
g__Hyphomicrobium_p__Proteobacteria	g__Rhizobium	0.7	0.0082672	positive
g__Lysobacter	g__Rhizobium	0.833333	0.0368662	positive
g__Kribbella	g__Mesorhizobium	0.716667	0.00450838	positive
g__Mesorhizobium	g__Novosphingobium	0.866667	0.000749559	positive
g__Hyphomicrobium	g__Mesorhizobium	0.933333	0.0172233	positive
g__Amycolatopsis	g__Mesorhizobium	0.783333	0.0107694	positive
g__Conexibacter	g__Nocardioides	0.816667	0.02139	positive
g__Conexibacter	g__Kribbella	0.766667	5.51146e-06	positive
g__Conexibacter	g__Solirubrobacterales_noname	1	0.02139	positive
g__Kribbella	g__Nocardioides	0.766667	0.0107694	positive
g__Nocardioides	g__Solirubrobacterales_noname	0.816667	0.02139	positive
g__Amycolatopsis	g__Nocardioides	0.766667	0.02139	positive
g__Kribbella	g__Solirubrobacterales_noname	0.766667	0.0311232	positive
g__Amycolatopsis	g__Kribbella	0.733333	0.043254	positive
g__Lysobacter	g__Reyranella	0.7	0.0254905	positive
g__Hyphomicrobium	g__Novosphingobium	0.75	0.0368662	positive
g__Amycolatopsis	g__Novosphingobium	0.716667	0.02139	positive
g__Gemmatimonas	g__Nitrospira	0.766667	0.000352734	positive
g__Burkholderia	g__Gemmatimonas	0.95	0.043254	positive
g__Acidobacteriaceae_noname	g__Gemmatimonas	0.7	0.0254905	positive
g__Gemmatimonas	g__Pseudomonas	0.75	0.0368662	positive
g__Candidatus_Solibacter	g__Nitrospira	0.716667	0.000352734	positive
g__Acidobacteriaceae_noname	g__Candidatus_Solibacter	0.95	0.000165344	positive
g__Candidatus_Koribacter	g__Candidatus_Solibacter	0.966667	0.0107694	positive
g__Acidobacteriaceae_noname	g__Nitrospira	0.816667	0.043254	positive
g__Candidatus_Koribacter	g__Nitrospira	0.7	0.043254	positive
g__Burkholderia	g__Pseudomonas	0.7	0.0030754	positive
g__Acidobacteriaceae_noname	g__Candidatus_Koribacter	0.883333	0.0082672	positive
g__Amycolatopsis	g__Hyphomicrobium	0.833333		positive
