# Supplementary material for: High Frankia abundance and low diversity of microbial community are associated with nodulation specificity and stability of sea buckthorn root nodule
Source: Front Plant Sci. 2024 Feb 21;15:1301447. doi: 10.3389/fpls.2024.1301447 (PMC10915256; doi:10.3389/fpls.2024.1301447)
Supplement: Supplementary file 7 [file Table_7.xlsx]

## Sheet: Supplementary Table S6
Supplementary Table S7 Spearman correlation coefficient of microbial community (genus level) in root nudule （RN） samples
Node_Num = 26, Edge_Num = 75
Node1_Name	Node2_Name	Coefficient	P-value	Relation
g__Frankia_p__Actinobacteria	g__Variovorax	-0.716667	0.0368662	negtive
g__Bradyrhizobium_p__Proteobacteria	g__Frankia	-0.733333	0.0311232	negtive
g__Frankia	g__Mycobacterium	-0.716667	0.0368662	negtive
g__Frankia	g__Sphingomonas	-0.866667	0.00450838	negtive
g__Frankia	g__Rhizobium	-0.75	0.0254905	negtive
g__Frankia	g__Novosphingobium	-0.783333	0.0172233	negtive
g__Frankia	g__Kribbella	-0.916667	0.00131173	negtive
g__Frankia	g__Mesorhizobium	-0.766667	0.02139	negtive
g__Bradyrhizobium	g__Micromonospora	-0.816667	0.0107694	negtive
g__Bradyrhizobium	g__Pseudonocardia	-0.7	0.043254	negtive
g__Actinoplanes_p__Actinobacteria	g__Amycolatopsis	-0.883333	0.0030754	negtive
g__Actinoplanes	g__Kitasatospora	-0.733333	0.0311232	negtive
g__Actinoplanes	g__Streptosporangium	-0.75	0.0254905	negtive
g__Devosia_p__Actinobacteria	g__Salinispora	-0.7	0.043254	negtive
g__Micromonospora_p__Actinobacteria	g__Rudaea	-0.7	0.043254	negtive
g__Pseudonocardia_p__Actinobacteria	g__Rudaea	-0.716667	0.0368662	negtive
g__Rudaea_p__Proteobacteria	g__Streptosporangium	-0.716667	0.0368662	negtive
g__Mesorhizobium_p__Proteobacteria	g__Micromonospora	-0.766667	0.02139	negtive
g__Micromonospora	g__Pseudomonas	-0.733333	0.0311232	negtive
g__Mesorhizobium	g__Pseudonocardia	-0.75	0.0254905	negtive
g__Devosia	g__Pseudonocardia	-0.816667	0.0107694	negtive
g__Devosia	g__Streptosporangium	-0.866667	0.00450838	negtive
g__Mycobacterium_p__Actinobacteria	g__Streptomyces_p__Actinobacteria	0.783333	0.0172233	positive
g__Novosphingobium_p__Proteobacteria	g__Streptomyces	0.816667	0.0107694	positive
g__Saccharothrix_p__Actinobacteria	g__Streptomyces	0.883333	0.0030754	positive
g__Agrobacterium_p__Proteobacteria	g__Streptomyces	0.966667	0.000165344	positive
g__Bradyrhizobium	g__Variovorax_p__Proteobacteria	0.9	0.00202822	positive
g__Actinoplanes	g__Variovorax	0.75	0.0254905	positive
g__Rhizobium_p__Proteobacteria	g__Variovorax	0.85	0.00607363	positive
g__Rudaea	g__Variovorax	0.9	0.00202822	positive
g__Mesorhizobium	g__Variovorax	0.95	0.000352734	positive
g__Devosia	g__Variovorax	0.833333	0.0082672	positive
g__Pseudomonas_p__Proteobacteria	g__Variovorax	0.833333	0.0082672	positive
g__Nocardioides_p__Actinobacteria	g__Variovorax	0.716667	0.0368662	positive
g__Bradyrhizobium	g__Sphingomonas_p__Proteobacteria	0.716667	0.0368662	positive
g__Bradyrhizobium	g__Rhizobium	0.816667	0.0107694	positive
g__Bradyrhizobium	g__Rudaea	0.916667	0.00131173	positive
g__Bradyrhizobium	g__Kribbella	0.75	0.0254905	positive
g__Actinomadura_p__Actinobacteria	g__Bradyrhizobium	0.733333	0.0311232	positive
g__Bradyrhizobium	g__Mesorhizobium	0.983333	4.96032e-05	positive
g__Bradyrhizobium	g__Devosia	0.766667	0.02139	positive
g__Bradyrhizobium	g__Pseudomonas	0.9	0.00202822	positive
g__Mycobacterium	g__Sphingomonas	0.75	0.0254905	positive
g__Agrobacterium	g__Mycobacterium	0.716667	0.0368662	positive
g__Actinoplanes	g__Rudaea	0.766667	0.02139	positive
g__Actinoplanes	g__Mesorhizobium	0.7	0.043254	positive
g__Actinoplanes	g__Devosia	0.766667	0.02139	positive
g__Amycolatopsis_p__Actinobacteria	g__Kitasatospora	0.833333	0.0082672	positive
g__Amycolatopsis	g__Saccharothrix	0.716667	0.0368662	positive
g__Amycolatopsis	g__Streptosporangium_p__Actinobacteria	0.783333	0.0172233	positive
g__Promicromonospora_p__Actinobacteria	g__Rhodococcus_p__Actinobacteria	0.75	0.0254905	positive
g__Novosphingobium	g__Sphingomonas	0.883333	0.0030754	positive
g__Kribbella_p__Actinobacteria	g__Sphingomonas	0.85	0.00607363	positive
g__Mesorhizobium	g__Sphingomonas	0.7	0.043254	positive
g__Rhizobium	g__Rudaea	0.766667	0.02139	positive
g__Kribbella	g__Rhizobium	0.7	0.043254	positive
g__Mesorhizobium	g__Rhizobium	0.833333	0.0082672	positive
g__Pseudomonas	g__Rhizobium	0.733333	0.0311232	positive
g__Pseudonocardia	g__Salinispora_p__Actinobacteria	0.916667	0.00131173	positive
g__Kitasatospora_p__Actinobacteria	g__Salinispora	0.8	0.0138283	positive
g__Kribbella	g__Novosphingobium	0.883333	0.0030754	positive
g__Agrobacterium	g__Novosphingobium	0.816667	0.0107694	positive
g__Mesorhizobium	g__Rudaea	0.933333	0.000749559	positive
g__Devosia	g__Rudaea	0.916667	0.00131173	positive
g__Pseudomonas	g__Rudaea	0.816667	0.0107694	positive
g__Kribbella	g__Mesorhizobium	0.716667	0.0368662	positive
g__Kitasatospora	g__Pseudonocardia	0.75	0.0254905	positive
g__Pseudonocardia	g__Streptosporangium	0.7	0.043254	positive
g__Actinomadura	g__Pseudomonas	0.916667	0.00131173	positive
g__Actinomadura	g__Nocardioides	0.8	0.0138283	positive
g__Devosia	g__Mesorhizobium	0.833333	0.0082672	positive
g__Mesorhizobium	g__Pseudomonas	0.85	0.00607363	positive
g__Saccharothrix	g__Streptosporangium	0.8	0.0138283	positive
g__Agrobacterium	g__Saccharothrix	0.816667	0.0107694	positive
g__Nocardioides	g__Pseudomonas	0.85	0.00607363	positive
