# Supplementary material for: High Frankia abundance and low diversity of microbial community are associated with nodulation specificity and stability of sea buckthorn root nodule
Source: Front Plant Sci. 2024 Feb 21;15:1301447. doi: 10.3389/fpls.2024.1301447 (PMC10915256; doi:10.3389/fpls.2024.1301447)
Supplement: Supplementary file 8 [file Table_8.xlsx]

## Sheet: Sheet1
Supplementary Table S8 The differences of all 19 Frankia strains contained in RN between different sites.
Strains	Cluster	DK (Mean ± SD, n=3)	FX (Mean ± SD, n=3)	SL (Mean ± SD, n=3)
s__Frankia_sp._EAN1pec	III	0.607074±0.036103a	0.591356±0.055468a	0.673381±0.008896a
s__Frankia_sp._BCU110501	III	0.137910±0.036509a	0.124617±0.015889a	0.145687±0.011299a
s__Frankia_sp._BMG5.12	III	0.096071±0.040952a	0.084765±0.010167a	0.034784±0.000682a
s__Frankia_sp._EUN1f	III	0.041878±0.003767a	0.081428±0.042516a	0.035513±0.002593a
s__Frankia_unclassified	unclassified	0.023332±0.000962b	0.026866±0.000359a	0.023855±0.000548b
s__Frankia_sp._CN3	IV	0.019716±0.001479a	0.021076±0.004949a	0.021851±0.001560a
s__Frankia_sp._CpI1-S	I	0.012695±0.002187a	0.012015±0.001134a	0.011003±0.000504a
s__Frankia_sp._QA3	I	0.009663±0.000957a	0.009300±0.001158a	0.011045±0.000401a
s__Frankia_sp._EuI1c	IV	0.009070±0.000272a	0.009508±0.000335a	0.010732±0.000280a
s__Frankia_symbiont_of_Datisca_glomerata	III	0.011191±0.000573a	0.009614±0.002447a	0.008146±0.001365a
s__Frankia_alni	I	0.006765±0.001411a	0.006758±0.001056a	0.008743±0.000618a
s__Frankia_sp._DC12	IV	0.006726±0.001712a	0.007262±0.000797a	0.003840±0.000189a
s__Frankia_sp._CcI3	I	0.005957±0.000973a	0.004577±0.000652a	0.004413±0.001638b
s__Frankia_sp._BMG5.23	I	0.005326±0.000805a	0.004702±0.000761a	0.002483±0.000618a
s__Frankia_sp._CcI6	I	0.002551±0.000738a	0.002795±0.000319a	0.002992±0.000693a
s__Frankia_sp._CeD	I	0.002825±0.001854a	0.002174±0.000445a	0.000723±0.000152a
s__Frankia_sp._Allo2	I	0.000976±0.000241a	0.000960±0.000079a	0.000441±0.000012a
s__Frankia_sp._Thr	I	0.000162±0.000072a	0.000110±0.000014a	0.000210±0.000085a
s__Frankia_sp._EuIK1	I	0.000111±0.000018ab	0.000118±0.000012a	0.000156±0.000007b
Notes: Mean: the average value of the same type of sample; SD: Standard Deviation; ANOVA was used to show the significance among groups at α=0.05 level.
