# Supplementary material for: High Frankia abundance and low diversity of microbial community are associated with nodulation specificity and stability of sea buckthorn root nodule
Source: Front Plant Sci. 2024 Feb 21;15:1301447. doi: 10.3389/fpls.2024.1301447 (PMC10915256; doi:10.3389/fpls.2024.1301447)
Supplement: Supplementary file 9 [file Table_9.xlsx]

## Sheet: Supplementary Table S8
Supplementary Table S9 Environment factors of the three different sampling sites
	DK (Mean ± SD, n=3)	FX (Mean ± SD, n=3)	SL (Mean ± SD, n=3)
pH	8.4±0.02a	8.32±0.1308a	6.3567±0.0513b
SOM (g/kg)	7.193±1.0917b	7.7043±0.7924b	48.9569±1.2519a
TN (g/kg)	0.4696±0.0526c	0.6081±0.0225b	2.2761±0.0286a
TP (g/kg)	0.3132±0.0141c	0.4268±0.012b	0.8158±0.0078a
TK (g/kg)	14.4622±0.7967c	22.6832±0.6803a	18.7847±0.0573b
AN (mg/kg)	22.4386±1.6289c	36.0312±3.5649b	147.5768±3.9372a
NH4+-N (mg/kg)	2.0713±0.5932c	2.5225±0.1942b	5.5845±0.2526a
NO3--N (mg/kg)	1.4887±0.2966b	2.848±0.6819b	8.6086±0.2966a
Notes: Mean: the average value of the same type of sample; SD: Standard Deviation; ANOVA (ANalysis Of Variance) was used to show the significance among groups at α=0.05 level. SOM: Soil organic matter; PH: Pondus Hydrogenii; TN: Total Nitrogen; TP: Total Phosphorus; TK: Total Potassium; NO3--N: nitrate nitrogen; NH4+-N: ammonium nitrogen. Nitrite nitrogen (NO 2−), AN: Available nitrogen; Availabl…
