# Supplementary material for: High Frankia abundance and low diversity of microbial community are associated with nodulation specificity and stability of sea buckthorn root nodule
Source: Front Plant Sci. 2024 Feb 21;15:1301447. doi: 10.3389/fpls.2024.1301447 (PMC10915256; doi:10.3389/fpls.2024.1301447)
Supplement: Supplementary file 10 [file Table_10.xlsx]

## Sheet: Supplementary Table S9
Supplementary Table S10 Effects of environmental factor in the partial Mantel test analysis undertaken on different compartment niches microbial community.
BS				NS				RN
character	r	P		character	r	P		character	r	P
AK	0.95	0.001		AK	0.654	0.006		AK	0.654	0.006
AN	0.646	0.014		AN	0.486	0.014		AN	0.486	0.014
MAT	0.618	0.014		MAT	0.469	0.017		MAT	0.469	0.014
TN	0.59	0.014		SOM	0.456	0.017		SOM	0.456	0.017
pH	0.537	0.014		AP	0.433	0.017		AP	0.433	0.017
SOM	0.622	0.017		TN	0.417	0.023		TN	0.417	0.028
AP	0.581	0.017		NO3--N	0.396	0.023		NO3--N	0.396	0.023
TP	0.563	0.017		TP	0.395	0.02		TP	0.395	0.02
NO3--N	0.541	0.017		pH	0.391	0.03		pH	0.391	0.03
NH4--N	0.309	0.02		TAP	0.119	0.255		TAP	0.119	0.307
TAP	0.383	0.023		NH4--N	0.11	0.179		NH4--N	0.11	0.19
TK	0.135	0.177		TK	-0.01	0.514		TK	-0.01	0.514
