# Supplementary material for: High Frankia abundance and low diversity of microbial community are associated with nodulation specificity and stability of sea buckthorn root nodule
Source: Front Plant Sci. 2024 Feb 21;15:1301447. doi: 10.3389/fpls.2024.1301447 (PMC10915256; doi:10.3389/fpls.2024.1301447)
Supplement: Supplementary file 11 [file Table_11.xlsx]

## Sheet: Supplementary Table S10
Supplementary Table S11 Correlation analysis of Frankia sp. EAN1 with environmental factors in NS and BS
Factors	NS			BS
	rho	pvalue		rho	pvalue
TAP	0.263523	0.49326		-0.790569	0.0112014
MAT	-0.263523	0.49326		0.790569	0.0112014
pH	0.05	0.911618		0.666667	0.05889
SOM	0.166667	0.677745		-0.583333	0.107997
TN	0.0666667	0.880093		-0.733333	0.0311232
TP	0.216667	0.580941		-0.65	0.0665619
TK	0.116667	0.775628		-0.0333333	0.948391
AN	0.266667	0.493331		-0.833333	0.0082672
NH4+-N	0.259416	0.500268		-0.686198	0.0412425
NO3--N	0.3	0.436624		-0.816667	0.0107694
AP	0.410045	0.27303		-0.72804	0.0261536
AK	-0.116667	0.775628		-0.716667	0.0368662
