# Supplementary material for: High Frankia abundance and low diversity of microbial community are associated with nodulation specificity and stability of sea buckthorn root nodule
Source: Front Plant Sci. 2024 Feb 21;15:1301447. doi: 10.3389/fpls.2024.1301447 (PMC10915256; doi:10.3389/fpls.2024.1301447)
Supplement: Supplementary file 12 [file Table_12.xlsx]

## Sheet: Supplementary Table S11
Supplementary Table S12 Distribution frequencies of nitrogen cycle pathways in BS, NS and RN.
Module	Module	DK				FX				SL
		BS (Mean ± SD, n=3)	NS (Mean ± SD, n=3)	RN (Mean ± SD, n=3)		BS (Mean ± SD, n=3)	NS (Mean ± SD, n=3)	RN (Mean ± SD, n=3)		BS (Mean ± SD, n=3)	NS (Mean ± SD, n=3)	RN (Mean ± SD, n=3)
M00530	Dissimilatory nitrate reduction	0.408±0.002	0.420±0.007	0.216±0.017		0.370±0.015	0.402±0.004	0.224±0.014		0.309±0.001	0.33±0.017	0.266±0.028
M00531	Assimilatory nitrate reduction	0.146±0.004	0.177±0.009	0.243±0.008		0.178±0.010	0.178±0.010	0.237±0.017		0.187±0.006	0.159±0.019	0.207±0.002
M00529	Denitrification	0.307±0.004	0.267±0.005	0.022±0.015		0.293±0.005	0.265±0.005	0.031±0.005		0.353±0.007	0.339±0.013	0.066±0.030
M00804	Complete nitrification	0.112±0.001	0.108±0.008	0.011±0.008		0.130±0.006	0.126±0.006	0.017±0.003		0.126±0.008	0.136±0.006	0.030±0.012
M00528	Nitrification	0.017±0	0.016±0.004	0±0		0.019±0.001	0.020±0.003	0±0		0.017±0.005	0.014±0.002	0±0
M00175	Nitrogen fixation	0.010±0	0.012±0.003	0.509±0.033		0.009±0.001	0.009±0.001	0.491±0.034		0.008±0.001	0.021±0.009	0.430±0.066
