# Supplementary material for: High Frankia abundance and low diversity of microbial community are associated with nodulation specificity and stability of sea buckthorn root nodule
Source: Front Plant Sci. 2024 Feb 21;15:1301447. doi: 10.3389/fpls.2024.1301447 (PMC10915256; doi:10.3389/fpls.2024.1301447)
Supplement: Supplementary file 13 [file Table_13.xlsx]

## Sheet: Supplementary Table S12
Supplementary Table S13 Comparative analysis of the relative abundance of species (top 10) of each nitrogen cycling pathways.
Module	Definition	Species	DK				FX				SL
			BS (Mean ± SD, n=3)	NS (Mean ± SD, n=3)	RN (Mean ± SD, n=3)		BS (Mean ± SD, n=3)	NS (Mean ± SD, n=3)	RN (Mean ± SD, n=3)		BS (Mean ± SD, n=3)	NS (Mean ± SD, n=3)	RN (Mean ± SD, n=3)
M00175	Nitrogen fixation: nitrogen => ammonia	s__Frankia_sp._EAN1pec	0.030±0.012	0.105±0.052	0.883±0.056		0.058±0.063	0.141±0.071	0.819±0.111		0.023±0.017	0.079±0.055	0.969±0.014
		s__Frankia_sp._EUN1f	0.033±0.002	0.035±0.014	0.034±0.028		0.036±0.011	0.080±0.036	0.135±0.080		0.029±0.008	0.018±0.011	0.007±0.001
		s__Frankia_sp._BMG5.12	0.022±0.002	0.038±0.013	0.044±0.039		0.122±0.038	0.087±0.005	0.031±0.027		0.033±0.011	0.016±0.005	0.000±0.000
		s__Frankia_sp._BCU110501	0.004±0.007	0.001±0.002	0.039±0.051		0.006±0.009	0.006±0.009	0.015±0.025		0.001±0.001	0.001±0.001	0.000±0.000
		s__Azoarcus_sp._KH32C	0.056±0.007	0.050±0.012	0.000±0.000		0.033±0.018	0.016±0.009	0.000±0.000		0.044±0.012	0.139±0.070	0.001±0.001
		s__uncultured_marine_thaumarchaeote_AD1000_06_A03	0.074±0.007	0.058±0.024	0.000±0.000		0.171±0.041	0.096±0.048	0.000±0.000		0.116±0.029	0.048±0.027	0.000±0.000
		s__Proteobacteria_bacterium_JGI_0001009-D17	0.020±0.015	0.031±0.011	0.000±0.000		0.015±0.008	0.008±0.008	0.000±0.000		0.046±0.011	0.094±0.021	0.002±0.001
		s__Amycolatopsis_balhimycina	0.054±0.013	0.050±0.005	0.000±0.000		0.085±0.011	0.096±0.025	0.001±0.000		0.028±0.009	0.014±0.004	0.000±0.000
		s__Bradyrhizobium_sp._DOA9	0.037±0.001	0.096±0.019	0.000±0.000		0.030±0.005	0.022±0.013	0.000±0.000		0.026±0.007	0.029±0.004	0.002±0.001
		s__uncultured_bacterium_F39-01	0.081±0.014	0.092±0.008	0.000±0.000		0.047±0.002	0.042±0.015	0.000±0.000		0.044±0.006	0.020±0.015	0.000±0.000
		others	0.590±0.015	0.444±0.010	0.000±0.000		0.396±0.021	0.407±0.036	0.000±0.000		0.611±0.035	0.543±0.051	0.019±0.012
M00528	Nitrification: ammonia => nitrite	s__uncultured_crenarchaeote	0.239±0.053	0.163±0.085	0.000±0.000		0.179±0.010	0.197±0.037	0.000±0.000		0.074±0.017	0.072±0.017	0.000±0.000
		s__Candidatus_Nitrososphaera_gargensis	0.228±0.036	0.141±0.060	0.000±0.000		0.125±0.022	0.103±0.023	0.000±0.000		0.209±0.016	0.147±0.022	0.000±0.000
		s__Nocardioidaceae_bacterium_Broad-1	0.097±0.020	0.090±0.053	0.000±0.000		0.121±0.020	0.116±0.018	0.000±0.000		0.059±0.036	0.085±0.039	0.000±0.000
		s__Candidatus_Nitrososphaera_evergladensis	0.107±0.018	0.071±0.019	0.000±0.000		0.140±0.005	0.124±0.009	0.000±0.000		0.031±0.009	0.039±0.031	0.000±0.000
		s__uncultured_archaeon	0.082±0.010	0.058±0.031	0.000±0.000		0.063±0.015	0.055±0.008	0.000±0.000		0.161±0.031	0.116±0.055	0.000±0.000
		s__Nitrosospira_sp._NpAV	0.033±0.010	0.105±0.036	0.000±0.000		0.070±0.008	0.099±0.010	0.000±0.000		0.077±0.032	0.098±0.007	0.000±0.000
		s__Nitrosospira_multiformis	0.014±0.006	0.041±0.010	0.000±0.000		0.035±0.008	0.052±0.006	0.000±0.000		0.147±0.057	0.097±0.069	0.000±0.000
		s__Thermoanaerobaculum_aquaticum	0.019±0.010	0.013±0.006	0.000±0.000		0.031±0.008	0.020±0.010	0.000±0.000		0.100±0.043	0.102±0.036	0.000±0.000
		s__uncultured_bacterium	0.019±0.012	0.045±0.026	0.000±0.000		0.043±0.011	0.053±0.018	0.000±0.000		0.017±0.008	0.051±0.009	0.000±0.000
		s__Nocardioides_luteus	0.007±0.005	0.015±0.005	0.000±0.000		0.090±0.021	0.052±0.010	0.000±0.000		0.019±0.020	0.026±0.014	0.000±0.000
		others	0.156±0.058	0.257±0.136	0.000±0.000		0.104±0.003	0.129±0.034	0.000±0.000		0.106±0.009	0.166±0.024	0.000±0.000
M00529	Denitrification: nitrate => nitrogen	s__Candidatus_Nitrospira_defluvii	0.081±0.021	0.074±0.019	0.000±0.001		0.085±0.023	0.076±0.007	0.005±0.002		0.073±0.012	0.068±0.011	0.006±0.002
		s__Gemmatimonadetes_bacterium_KBS708	0.037±0.004	0.020±0.002	0.003±0.003		0.023±0.002	0.015±0.002	0.002±0.001		0.074±0.009	0.041±0.021	0.002±0.001
		s__uncultured_bacterium	0.021±0.004	0.017±0.001	0.003±0.003		0.028±0.004	0.022±0.002	0.003±0.004		0.046±0.004	0.043±0.005	0.010±0.002
		s__Variovorax_paradoxus	0.022±0.001	0.024±0.002	0.124±0.031		0.009±0.002	0.010±0.002	0.034±0.034		0.023±0.000	0.028±0.003	0.040±0.012
		s__Pseudonocardia_acaciae	0.004±0.000	0.005±0.003	0.000±0.000		0.026±0.003	0.025±0.002	0.004±0.000		0.013±0.001	0.023±0.010	0.003±0.003
		s__Pseudomonas_taeanensis	0.009±0.003	0.007±0.001	0.000±0.000		0.011±0.002	0.006±0.001	0.000±0.001		0.028±0.003	0.025±0.002	0.001±0.000
		s__Nocardia_vinacea	0.002±0.000	0.006±0.002	0.131±0.119		0.005±0.002	0.029±0.003	0.267±0.051		0.001±0.000	0.005±0.006	0.179±0.121
		s__Ralstonia_solanacearum	0.013±0.001	0.012±0.003	0.010±0.005		0.008±0.001	0.007±0.000	0.005±0.002		0.021±0.001	0.022±0.002	0.025±0.009
		s__Nocardioides_halotolerans	0.013±0.005	0.014±0.001	0.021±0.009		0.025±0.003	0.021±0.002	0.020±0.007		0.004±0.001	0.009±0.004	0.015±0.002
		s__Bradyrhizobium_unclassified	0.007±0.000	0.010±0.003	0.003±0.002		0.019±0.004	0.021±0.008	0.016±0.007		0.008±0.001	0.014±0.003	0.030±0.010
		others	0.791±0.013	0.811±0.020	0.705±0.142		0.760±0.018	0.767±0.021	0.645±0.013		0.709±0.004	0.722±0.023	0.690±0.102
M00530	Dissimilatory nitrate reduction: nitrate => ammonia	s__Frankia_sp._EAN1pec	0.003±0.001	0.003±0.001	0.791±0.128		0.004±0.001	0.004±0.002	0.703±0.067		0.001±0.000	0.003±0.001	0.605±0.116
		s__Candidatus_Nitrospira_defluvii	0.054±0.012	0.042±0.011	0.000±0.000		0.064±0.013	0.046±0.005	0.000±0.000		0.082±0.009	0.069±0.016	0.001±0.000
		s__Variovorax_paradoxus	0.038±0.002	0.028±0.000	0.016±0.010		0.022±0.007	0.020±0.003	0.021±0.011		0.034±0.005	0.042±0.002	0.022±0.010
		s__Bradyrhizobium_elkanii	0.013±0.002	0.023±0.005	0.002±0.003		0.030±0.003	0.029±0.009	0.007±0.003		0.026±0.003	0.031±0.008	0.015±0.005
		s__Candidatus_Solibacter_usitatus	0.034±0.003	0.016±0.003	0.000±0.000		0.018±0.002	0.011±0.002	0.000±0.000		0.038±0.002	0.019±0.012	0.001±0.000
		s__Mycobacterium_sp._URHB0044	0.006±0.000	0.017±0.003	0.001±0.001		0.014±0.006	0.056±0.018	0.007±0.003		0.003±0.001	0.007±0.002	0.005±0.003
		s__Chthoniobacter_flavus	0.021±0.003	0.014±0.002	0.000±0.000		0.015±0.001	0.012±0.003	0.000±0.000		0.036±0.003	0.019±0.007	0.000±0.000
		s__Nocardia_vinacea	0.002±0.000	0.005±0.002	0.020±0.017		0.004±0.002	0.024±0.004	0.047±0.010		0.001±0.000	0.006±0.007	0.055±0.035
		s__Nocardioides_halotolerans	0.010±0.003	0.009±0.001	0.002±0.001		0.020±0.003	0.014±0.001	0.003±0.001		0.005±0.001	0.009±0.003	0.004±0.001
		s__Nocardioides_sp._CF8	0.009±0.001	0.009±0.002	0.001±0.001		0.017±0.003	0.014±0.002	0.003±0.002		0.006±0.000	0.009±0.005	0.003±0.001
		Others	0.810±0.007	0.834±0.008	0.167±0.102		0.791±0.012	0.769±0.007	0.208±0.052		0.768±0.014	0.787±0.012	0.290±0.085
M00531	Assimilatory nitrate reduction: nitrate => ammonia	s__Frankia_sp._EAN1pec	0.000±0.000	0.001±0.000	0.500±0.088		0.002±0.002	0.002±0.001	0.509±0.047		0.001±0.001	0.004±0.006	0.573±0.106
		s__Frankia_sp._BCU110501	0.002±0.000	0.005±0.002	0.331±0.030		0.001±0.000	0.002±0.001	0.204±0.043		0.000±0.000	0.001±0.001	0.136±0.017
		s__Sorangium_cellulosum	0.079±0.004	0.055±0.006	0.002±0.001		0.080±0.005	0.050±0.004	0.001±0.002		0.136±0.009	0.111±0.016	0.003±0.002
		s__Frankia_sp._BMG5.12	0.001±0.001	0.001±0.001	0.106±0.063		0.000±0.000	0.004±0.002	0.171±0.071		0.000±0.000	0.001±0.001	0.061±0.009
		s__Bradyrhizobium_elkanii	0.022±0.004	0.040±0.006	0.001±0.001		0.044±0.006	0.051±0.012	0.006±0.003		0.035±0.005	0.052±0.009	0.011±0.01
		s__Pyrinomonas_methylaliphatogenes	0.022±0.003	0.015±0.003	0.000±0.000		0.029±0.002	0.028±0.009	0.000±0.000		0.104±0.010	0.049±0.037	0.001±0.001
		s__Candidatus_Solibacter_usitatus	0.027±0.001	0.015±0.001	0.000±0.000		0.017±0.002	0.015±0.003	0.001±0.001		0.048±0.001	0.028±0.015	0.000±0.000
		s__Variovorax_paradoxus	0.033±0.003	0.022±0.004	0.005±0.004		0.017±0.007	0.015±0.003	0.008±0.001		0.014±0.001	0.022±0.007	0.009±0.008
		s__Acidobacteriaceae_bacterium_URHE0068	0.047±0.006	0.024±0.001	0.000±0.000		0.021±0.006	0.016±0.002	0.000±0.000		0.019±0.003	0.012±0.004	0.001±0.001
		s__delta_proteobacterium_JGI_0002000-E07	0.015±0.000	0.015±0.003	0.000±0.000		0.021±0.004	0.014±0.001	0.000±0.000		0.029±0.003	0.026±0.002	0.000±0.000
		others	0.753±0.002	0.808±0.005	0.056±0.030		0.766±0.018	0.804±0.008	0.098±0.023		0.615±0.009	0.694±0.056	0.205±0.100
M00804	Complete nitrification: ammonia => nitrite => nitrate	s__Candidatus_Nitrospira_defluvii	0.185±0.044	0.150±0.026	0.001±0.001		0.171±0.048	0.137±0.017	0.006±0.003		0.179±0.018	0.147±0.035	0.011±0.005
		s__Nocardioides_halotolerans	0.036±0.013	0.036±0.002	0.044±0.022		0.057±0.005	0.043±0.004	0.038±0.014		0.012±0.003	0.021±0.009	0.033±0.011
		s__Variovorax_paradoxus	0.041±0.005	0.039±0.005	0.181±0.046		0.010±0.002	0.012±0.004	0.047±0.051		0.037±0.002	0.040±0.002	0.034±0.008
		s__Nocardioides_sp._CF8	0.027±0.005	0.030±0.010	0.019±0.008		0.043±0.006	0.042±0.008	0.031±0.020		0.014±0.002	0.022±0.012	0.023±0.008
		s__Nocardia_vinacea	0.003±0.001	0.008±0.002	0.112±0.098		0.008±0.002	0.045±0.007	0.368±0.073		0.002±0.001	0.009±0.010	0.264±0.140
		s__uncultured_crenarchaeote	0.036±0.008	0.024±0.017	0.000±0.000		0.027±0.002	0.032±0.010	0.000±0.000		0.010±0.005	0.008±0.002	0.000±0.000
		s__Candidatus_Nitrososphaera_gargensis	0.035±0.005	0.021±0.013	0.000±0.000		0.019±0.003	0.017±0.006	0.000±0.000		0.028±0.009	0.015±0.002	0.000±0.000
		s__uncultured_bacterium	0.016±0.004	0.015±0.003	0.000±0.000		0.021±0.001	0.021±0.002	0.003±0.003		0.021±0.003	0.023±0.008	0.008±0.003
		s__Janibacter_sp._HTCC2649	0.017±0.004	0.019±0.006	0.019±0.015		0.028±0.008	0.028±0.005	0.011±0.011		0.006±0.001	0.013±0.005	0.009±0.004
		s__Candidatus_Accumulibacter_sp._SK-01	0.032±0.001	0.023±0.004	0.024±0.014		0.006±0.003	0.007±0.002	0.009±0.003		0.021±0.003	0.021±0.004	0.007±0.001
		others	0.572±0.026	0.634±0.019	0.600±0.084		0.611±0.047	0.616±0.013	0.487±0.023		0.671±0.025	0.681±0.019	0.610±0.116
Notes: Mean: the average value of the same type of sample; SD: Standard Deviation.
